# Supplementary material for: Mucosal Barrier and Th2 Immune Responses Are Enhanced by Dietary Inulin in Pigs Infected With Trichuris suis
Source: PubMed Central journal article supplement (PMC6237860; doi:10.3389/fimmu.2018.02557), 2018-11-09
Supplement: Data_Sheet_2.pdf [file Data_Sheet_2.pdf]

**Table S1: Composition of basal (control) and experimental inulin-supplemented diet.** Both diets were pre-mixed, and balanced for crude protein and energy content. Purified long-chain inulin contained average degree of polymerization (DP)  $\geq$  23.

| <b>Ingredient (g/kg)</b>        | <b>Basal (control)</b> | <b>Inulin</b> |
|---------------------------------|------------------------|---------------|
| Barley                          | 577.0                  | 293.0         |
| Wheat                           | 163.0                  | 2900          |
| Inulin <sup>1</sup>             | -                      | 100.0         |
| Soybean meal                    | 202.0                  | 228.0         |
| Palm oil distillate fatty acids | 15.0                   | 30.0          |
| Molasses                        | 15.0                   | 12.0          |
| Calcium carbonate               | 13.0                   | 13.0          |
| Calcium phosphate               | 7.0                    | 7.0           |
| Sodium chloride                 | 3.0                    | 4.0           |
| L-lysine hydrochloride          | 2.0                    | 2.0           |
| Methionine                      | 1.0                    | 1.0           |
| Vitamin mix                     | 2.0                    | 2.0           |
| <b>Calculated composition</b>   |                        |               |
| Crude protein (g/kg)            | 160.0                  | 160.0         |
| Metabolisable energy (MJ/kg)    | 12.6                   | 12.5          |
| <b>Analysed composition</b>     |                        |               |
| Dry matter (%)                  | 90.7                   | 91.1          |
| Fat (%)                         | 4.1                    | 5.1           |
| Crude fibre (%)                 | 3.0                    | 3.0           |
| Ash (%)                         | 5.2                    | 5.1           |
| Lysine (%)                      | 1.0                    | 1.0           |
| Methionine (%)                  | 0.3                    | 0.3           |
| Calcium (%)                     | 0.7                    | 0.7           |
| Phosphorous (%)                 | 0.5                    | 0.5           |
| Sodium (%)                      | 0.2                    | 0.2           |
| Crude protein (g/kg)            | 162.0                  | 173.0         |
| Metabolisable energy (MJ/kg)    | 13.9                   | 14.5          |

<sup>1</sup> Long-chain inulin purified from chicory root (Orafti<sup>®</sup> HP, Beneo, Netherlands).
